# Supplementary material
Source: Springer Nature journal article supplement (https://www.springermedizin.de/resource/supplementary/12879_2011_1727_MOESM2_ESM.pdf/9443570)

Seroprevalence of NA to PV1,2,3 [%]

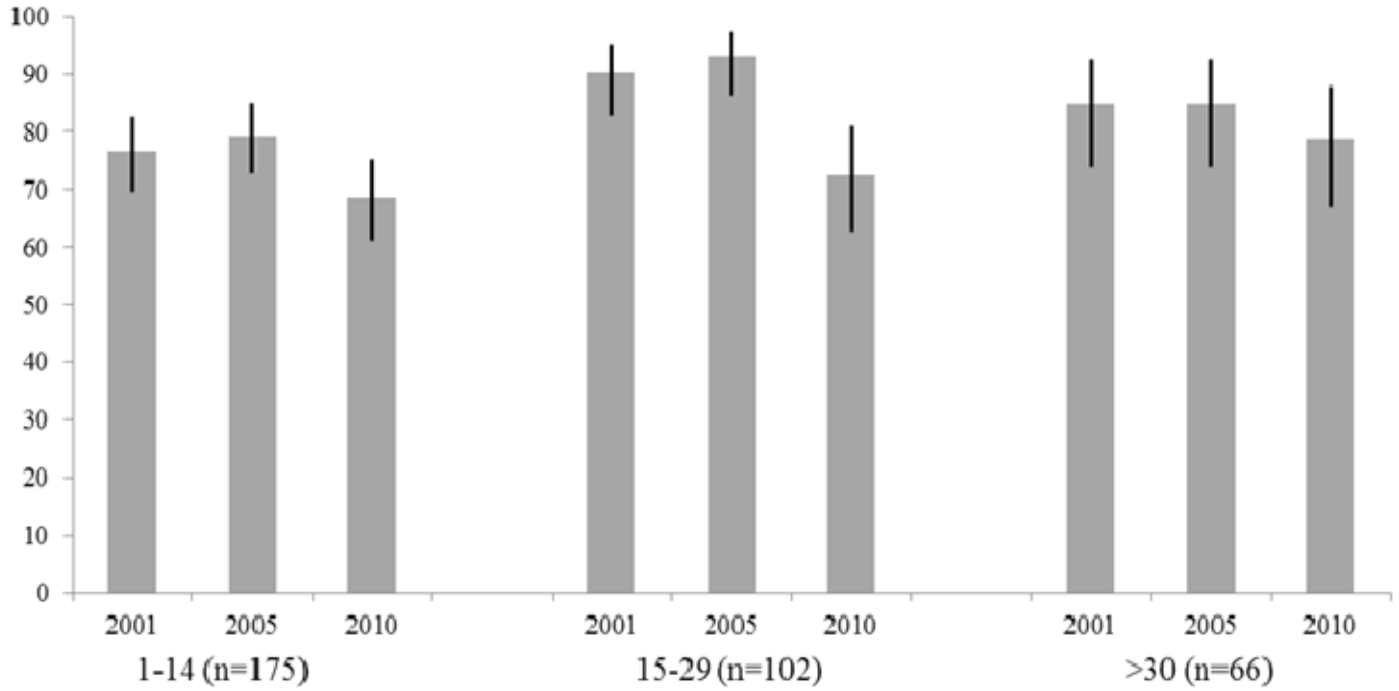

Type of poliovirus and age group (years)

Supplement: MOESM2 [file 9443570]
